# Supplementary material for: Potential of easily prepared low-cost rice husk biochar and burnt clay composite for the removal of methylene blue dye from contaminated water
Source: Royal Society of Chemistry journal article supplement (doi:10.1039/d3ew00392b), 2023-01-01
Supplement: d3ew00392b2.pdf [file d3ew00392b2.pdf]

## Potential of easily prepared low cost rice husk biochar and burnt clay composite for removal of Methylene Blue dye from contaminated water

Qudsia Ghzal<sup>a1</sup>, Tariq Javed<sup>a\*</sup> & Maryam Batool<sup>a2</sup>

a\* is corresponding author.

<sup>a1</sup> [qudsiaguzal@gmail.com](mailto:qudsiaguzal@gmail.com), <sup>a\*</sup> [mtariq@uosahawal.edu.pk](mailto:mtariq@uosahawal.edu.pk), [maryambatool6666@gmail.com](mailto:maryambatool6666@gmail.com)<sup>a2</sup>

Department of Chemistry, University of Sahiwal, Sahiwal, Punjab, Pakistan<sup>a, a\*, a2</sup>

**Table S1.** Chemical composition analysis of burnt clay, rice husk biochar and ideal RHBC/BC adsorbent.

### Chemical composition

| Compound                       | Burnt clay | Rice husk biochar | Ideal RHBC/BC |
|--------------------------------|------------|-------------------|---------------|
| SiO <sub>2</sub>               | 64.1       | -                 | 19.80         |
| Al <sub>2</sub> O <sub>3</sub> | 15.9       | -                 | 2.65          |
| Fe <sub>2</sub> O <sub>3</sub> | 4.2        | -                 | 1.55          |
| ZrO <sub>2</sub>               | 6.8        | -                 | 1.12          |
| CaO                            | 1.2        | 0.2               | 1.50          |
| K <sub>2</sub> O               | 2.2        | -                 | 0.70          |
| SO <sub>3</sub>                | 1.04       | -                 | 1.01          |
| Nitrogen content               | 1.06       | 1.80              | 2.50          |
| Ash content                    | 1.045      | 47.9              | 48.07         |
| Lignin and cellulose           | -          | 39.1              | 13.1          |
| Protein content                | 2.455      | 11.0              | 8.00          |

**Table S2**

Results of experiment to study the effect of pH Value (Experimental conditions; pH = variable (1-14), volume = 10 ml, C<sub>o</sub> = 10 ppm, adsorbent dose = 0.25 g, contact time = 50 min, temperature = 20°C)

| pH | A <sub>i</sub> | A <sub>f</sub> | C <sub>e</sub> | % removal |
|----|----------------|----------------|----------------|-----------|
| 1  | 1.36           | 0.472          | 0.0561         | 65.2941   |
| 2  | 1.923          | 0.437          | 0.052          | 77.2751   |
| 3  | 2.09           | 0.466          | 0.0554         | 77.7033   |

|    |       |       |        |         |
|----|-------|-------|--------|---------|
| 4  | 1.965 | 0.332 | 0.0395 | 83.1043 |
| 5  | 1.784 | 0.278 | 0.0331 | 84.4170 |
| 6  | 1.972 | 0.113 | 0.1344 | 94.2698 |
| 7  | 2.012 | 0.023 | 0.0027 | 98.8568 |
| 8  | 1.772 | 0.055 | 0.0065 | 96.8962 |
| 9  | 1.64  | 0.07  | 0.0083 | 95.7317 |
| 10 | 1.733 | 0.1   | 0.0119 | 94.2296 |
| 11 | 1.709 | 0.15  | 0.0178 | 91.2229 |
| 12 | 1.634 | 0.16  | 0.0190 | 90.2080 |
| 13 | 1.881 | 0.406 | 0.0483 | 74.5131 |
| 14 | 0.643 | 0.213 | 0.0253 | 66.8740 |

**Table S3**

Results of experiment to determine the point of zero charge.

| <b>pH<sub>i</sub></b> | <b>ΔpH</b> |
|-----------------------|------------|
| 2                     | 0.6        |
| 3                     | 1.11       |
| 4                     | 1.54       |
| 5                     | 1.62       |
| 6                     | 1.78       |
| 7                     | -0.5       |
| 8                     | -0.89      |
| 9                     | -0.99      |
| 10                    | -1.97      |

**Table S4**

Results of experiment to study the effect of adsorbent dose (Experimental conditions; Adsorbent dose = variable (0.05- 0.5 g), volume = 10 ml, C<sub>o</sub> = 10 ppm, contact time = 50 min, pH = 7, temperature = 20°C)

| <b>Adsorbent dose<br/>(g)</b> | $A_i$ | $A_f$ | $C_e$  | <b>% Removal</b> |
|-------------------------------|-------|-------|--------|------------------|
| 0.05                          | 1.991 | 0.391 | 1.7209 | 80.3616          |
| 0.1                           | 1.991 | 0.207 | 0.9111 | 89.6032          |
| 0.15                          | 1.991 | 0.193 | 0.8495 | 90.3064          |
| 0.2                           | 1.991 | 0.142 | 0.625  | 92.8679          |
| 0.25                          | 1.991 | 0.058 | 0.2553 | 97.0868          |
| 0.3                           | 1.991 | 0.057 | 0.2509 | 97.1371          |
| 0.35                          | 1.991 | 0.045 | 0.1981 | 97.7398          |
| 0.4                           | 1.991 | 0.009 | 0.0396 | 99.5479          |
| 0.45                          | 1.991 | 0.009 | 0.0396 | 99.5479          |
| 0.5                           | 1.991 | 0.009 | 0.0396 | 99.5479          |

**Table S5**

Results of experiment to study the effect of contact time (Experimental conditions; contact time = variable (5-70 min), volume = 10 ml,  $C_o$  = 10 ppm, adsorbent dose = 0.25 g, pH = 7 temperature = 20°C)

| <b>Contact time<br/>(minutes)</b> | $A_i$ | $A_f$ | $C_e$  | <b>% Removal</b> |
|-----------------------------------|-------|-------|--------|------------------|
| 5                                 | 1.505 | 0.51  | 5.0295 | 66.1129          |
| 10                                | 1.505 | 0.371 | 3.6588 | 75.3488          |
| 15                                | 1.505 | 0.281 | 2.7712 | 81.3289          |
| 20                                | 1.505 | 0.22  | 2.1696 | 85.3821          |
| 25                                | 1.505 | 0.177 | 1.7456 | 88.2392          |
| 30                                | 1.505 | 0.134 | 1.3215 | 91.0963          |
| 40                                | 1.505 | 0.096 | 0.9467 | 93.6213          |
| 50                                | 1.505 | 0.072 | 0.7101 | 95.2159          |
| 60                                | 1.505 | 0.05  | 0.4931 | 96.6777          |

|    |       |      |        |         |
|----|-------|------|--------|---------|
| 70 | 1.505 | 0.02 | 0.1972 | 98.6711 |
|----|-------|------|--------|---------|

**Table S6**

Results of experiment to study the effect of initial dye concentration (Experimental conditions;  $C_o$  = variable (5-40 ppm), volume = 10 ml, adsorbent dose = 0.25 g, contact time = 50 min, pH = 7, temperature = 20°C)

| <b>Concentration<br/>(ppm)</b> | $A_i$ | $A_f$  | $C_e$   | <b>% Removal</b> |
|--------------------------------|-------|--------|---------|------------------|
| 5                              | 0.884 | 0.045  | 0.8806  | 94.9095          |
| 10                             | 1.808 | 0.0904 | 1.7691  | 95               |
| 15                             | 1.829 | 0.169  | 3.3072  | 90.76            |
| 20                             | 1.868 | 0.312  | 6.1056  | 83.2976          |
| 25                             | 2.106 | 0.455  | 8.9041  | 78.3951          |
| 30                             | 2.399 | 0.636  | 12.4461 | 73.4891          |
| 35                             | 2.666 | 0.782  | 15.3033 | 70.6676          |
| 40                             | 2.897 | 0.999  | 19.5499 | 65.5161          |

**Table S7**

Results of experiment to study the effect of temperature (Experimental conditions; temperature = variable (10-70°C), volume = 10 ml,  $C_o = 10$  ppm, adsorbent dose = 0.25 g, contact time = 50 min, pH = 7)

| Temperature (C°) | $A_i$ | $A_f$ | Ce     | % Removal |
|------------------|-------|-------|--------|-----------|
| 10               | 1.452 | 0.042 | 0.2241 | 97.11     |
| 20               | 1.59  | 0.071 | 0.3789 | 95.53     |
| 30               | 1.793 | 0.1   | 0.5336 | 94.42     |
| 40               | 1.802 | 0.162 | 0.8645 | 91.01     |
| 50               | 1.903 | 0.237 | 1.2647 | 87.54     |
| 60               | 1.908 | 0.3   | 1.6008 | 84.27     |
| 70               | 1.942 | 0.473 | 2.5240 | 75.64     |

**Table S8**

Statistical data for Pseudo first order kinetics

| Time (min) | $C_e(\frac{mg}{L})$ | $Q_t(\frac{mg}{L})$ | $\log Q_e - Q_t$ |
|------------|---------------------|---------------------|------------------|
| 5          | 5.0296              | 0.1988              | -0.7137          |
| 10         | 3.6588              | 0.2536              | -0.8587          |
| 15         | 2.7712              | 0.2891              | -0.9873          |
| 20         | 2.1696              | 0.3132              | -1.1029          |
| 25         | 1.7456              | 0.3301              | -1.2081          |
| 30         | 1.3215              | 0.3471              | -1.3471          |
| 40         | 0.9467              | 0.3621              | -1.5231          |
| 50         | 0.7101              | 0.3716              | -1.6880          |
| 60         | 0.4931              | 0.3803              | -1.9268          |
| 70         | 0.1972              | 0.3921              | -----            |

**Table S9**

Statistical data for Pseudo second order kinetics

| Time (min) | $C_e(\frac{mg}{L})$ | $Q_t(\frac{mg}{L})$ | $\frac{t}{Q_t}$ |
|------------|---------------------|---------------------|-----------------|
| 5          | 5.0296              | 0.1988              | 25.1488         |
| 10         | 3.6588              | 0.2536              | 39.4245         |
| 15         | 2.7712              | 0.2891              | 51.8758         |
| 20         | 2.1696              | 0.3132              | 63.8539         |
| 25         | 1.7455              | 0.3301              | 75.7168         |
| 30         | 1.3215              | 0.3471              | 86.4205         |
| 40         | 0.9467              | 0.3621              | 110.4575        |
| 50         | 0.7101              | 0.3716              | 134.5541        |
| 60         | 0.4931              | 0.3803              | 157.7801        |
| 70         | 0.1972              | 0.3921              | 178.5211        |

**Table S10**

Statistical data for intraparticle diffusion model

| Time (min) | $t^{1/2}$ | $C_e(\frac{mg}{L})$ | $Q_t(\frac{mg}{L})$ |
|------------|-----------|---------------------|---------------------|
| 5          | 2.236     | 5.0295              | 0.1988              |
| 10         | 3.162     | 3.6587              | 0.2536              |
| 15         | 3.872     | 2.7712              | 0.2891              |
| 20         | 4.472     | 2.1696              | 0.3132              |
| 25         | 5         | 1.7456              | 0.3302              |

|    |       |        |        |
|----|-------|--------|--------|
| 30 | 5.477 | 1.3215 | 0.3471 |
| 40 | 6.324 | 0.9467 | 0.3621 |
| 50 | 7.071 | 0.7101 | 0.3716 |
| 60 | 7.745 | 0.4931 | 0.3803 |
| 70 | 8.366 | 0.1972 | 0.3921 |

**Table S11**

Statistical data for Liquid film mode.

| Time<br>(min) | $C_e(\frac{mg}{L})$ | $Q_t(\frac{mg}{L})$ | $Q_e(\frac{mol}{L})$ | $\frac{Q_t}{Q_e}$ | $1 - \frac{Q_t}{Q_e}$ | $\ln(1 - \frac{Q_t}{Q_e})$ | $Bt = -0.4977 - \ln(1 - \frac{Q_t}{Q_e})$ |
|---------------|---------------------|---------------------|----------------------|-------------------|-----------------------|----------------------------|-------------------------------------------|
| 5             | 5.03                | 0.2                 | 0.39                 | 0.51              | 0.4929                | -0.7073                    | 0.2096                                    |
| 10            | 3.66                | 0.25                | 0.39                 | 0.65              | 0.3531                | -1.0409                    | 0.5432                                    |
| 15            | 2.77                | 0.29                | 0.39                 | 0.74              | 0.2626                | -1.3372                    | 0.8395                                    |
| 20            | 2.17                | 0.31                | 0.39                 | 0.8               | 0.2012                | -1.6034                    | 1.1057                                    |
| 25            | 1.74                | 0.33                | 0.39                 | 0.84              | 0.1579                | -1.8455                    | 1.3478                                    |
| 30            | 1.32                | 0.35                | 0.39                 | 0.88              | 0.1147                | -2.1655                    | 1.6678                                    |
| 40            | 0.95                | 0.36                | 0.39                 | 0.92              | 0.0764                | -2.5710                    | 2.0733                                    |
| 50            | 0.71                | 0.37                | 0.39                 | 0.95              | 0.0523                | -2.9505                    | 2.4528                                    |
| 60            | 0.49                | 0.38                | 0.39                 | 0.97              | 0.0301                | -3.5005                    | 3.0028                                    |
| 70            | 0.2                 | 0.39                | 0.39                 | 1                 | 0                     | -----                      | -----                                     |

**Table S12.**

Correlation of the MB adsorption on RHBC/BC kinetics model.

| Kinetic model      | Parameter            | Value                          |
|--------------------|----------------------|--------------------------------|
| Pseudo-first order | $K_1$                | 0.0492842 min <sup>-1</sup>    |
|                    | $Q_{eq}(\text{exp})$ | 0.392110454 mg g <sup>-1</sup> |

|                               |                       |                                                   |
|-------------------------------|-----------------------|---------------------------------------------------|
|                               | Q <sub>eq</sub> (cal) | 0.221 mg g <sup>-1</sup>                          |
|                               | R <sup>2</sup>        | 0.9941                                            |
| Pseudo-second order           | K <sub>2</sub>        | 0.3483393245 g mg <sup>-1</sup> min <sup>-1</sup> |
|                               | Q <sub>eq</sub> (exp) | 0.392110454 mg g <sup>-1</sup>                    |
|                               | Q <sub>eq</sub> (cal) | 0.4249532551 mg g <sup>-1</sup>                   |
|                               | R <sup>2</sup>        | 0.9994                                            |
| Intraparticle diffusion model | K <sub>id</sub>       | 0.0293 min <sup>0.5</sup>                         |
|                               | R <sup>2</sup>        | 0.9169                                            |
| Liquid film model             | K <sub>fd</sub>       | 0.0493min <sup>-1</sup>                           |
|                               | R <sup>2</sup>        | 0.9941                                            |

**Table S13**

Experimental data for Langmuir isotherm model

| Initial conc. (ppm) | Initial Conc. (mol/L) | $C_e(\frac{mol}{L})$ | $C_e(\frac{mg}{L})$ | $C_{ads} = C_o - C_e \frac{V}{M} (\frac{mol}{g})$ |
|---------------------|-----------------------|----------------------|---------------------|---------------------------------------------------|
| 5                   | 1.56E-05              | 2.75E-06             | 0.8806              | 5.15E-07                                          |
| 10                  | 3.13E-05              | 5.53E-06             | 1.7691              | 1.03E-06                                          |
| 15                  | 4.69E-05              | 1.03E-05             | 3.3072              | 1.46E-06                                          |
| 20                  | 6.25E-05              | 1.91E-05             | 6.1057              | 1.74E-06                                          |
| 25                  | 7.82E-05              | 2.78E-05             | 8.9041              | 2.01E-06                                          |
| 30                  | 9.38E-05              | 3.89E-05             | 12.4461             | 2.2E-06                                           |
| 35                  | 1.09E-04              | 4.78E-05             | 15.3033             | 2.46E-06                                          |
| 40                  | 1.25E-04              | 6.11E-05             | 19.5499             | 2.56E-06                                          |

**Table S14**

Calculation for R<sub>L</sub> value



| $b = \frac{L}{mol}$ | Initial dye concentration (mol/L) | $R_L$ |
|---------------------|-----------------------------------|-------|
| 7.80E-04            | 1.563E-05                         | 1     |
| 7.80E-04            | 3.126E-05                         | 1     |
| 7.80E-04            | 4.690E-05                         | 1     |
| 7.80E-04            | 6.253E-05                         | 1     |
| 7.80E-04            | 7.816E-05                         | 1     |
| 7.80E-04            | 9.379E-05                         | 1     |
| 7.80E-04            | 1.094E-04                         | 1     |
| 7.80E-04            | 1.251E-04                         | 1     |

**Table S15**

Experimental data for Freundlich isotherm model

| Initial conc. (ppm) | Initial Conc. (mol/L) | $C_e(ppm)$ | $C_e(mol/L)$ | $C_{ads} = C_o - C_e \frac{V}{M}$ | $\log C_e$ | $\log C_{ads}$ |
|---------------------|-----------------------|------------|--------------|-----------------------------------|------------|----------------|
| 5                   | 1.56E-05              | 0.8806     | 2.75E-06     | 5.15E-07                          | -5.5601    | -6.2881        |
| 10                  | 3.13E-05              | 1.7691     | 5.53E-06     | 1.03E-06                          | -5.2572    | -5.9874        |
| 15                  | 4.69E-05              | 3.3072     | 1.03E-05     | 1.46E-06                          | -4.9855    | -5.8349        |
| 20                  | 6.25E-05              | 6.1056     | 1.91E-05     | 1.74E-06                          | -4.7192    | -5.7600        |
| 25                  | 7.82E-05              | 8.9041     | 2.78E-05     | 2.01E-06                          | -4.5553    | -5.6961        |
| 30                  | 9.38E-05              | 12.4461    | 3.89E-05     | 2.19E-06                          | -4.4099    | -5.6585        |
| 35                  | 1.09E-04              | 15.3033    | 4.78E-05     | 2.46E-06                          | -4.3202    | -5.6084        |
| 40                  | 1.25E-04              | 19.5499    | 6.11E-05     | 2.56E-06                          | -4.2138    | -5.5921        |

**Table S16**

Experimental data for Dubinin-Radushkevich model

| Initial conc. (ppm) or mg/L | $C_e(ppm)$ | $C_{ads} = C_o - C_e \frac{V}{M}$ | $\ln C_{ads}$ | $\varepsilon = RT\{1 + (1 +$ | $\varepsilon^2$ |
|-----------------------------|------------|-----------------------------------|---------------|------------------------------|-----------------|
| 5                           | 0.8806     | 5.15E-07                          | -14.4787      | 2.1288                       | 4.5319          |
| 10                          | 1.7690     | 1.03E-06                          | -13.7866      | 2.0128                       | 4.0515          |
| 15                          | 3.3072     | 1.46E-06                          | -13.4355      | 1.9088                       | 3.6436          |
| 20                          | 6.1057     | 1.74E-06                          | -13.2630      | 1.8069                       | 3.2648          |
| 25                          | 8.9041     | 2.01E-06                          | -13.1159      | 1.7441                       | 3.0419          |
| 30                          | 12.4461    | 2.19E-06                          | -13.0292      | 1.6884                       | 2.8508          |
| 35                          | 15.3033    | 2.46E-06                          | -12.9140      | 1.6541                       | 2.7359          |
| 40                          | 19.5499    | 2.56E-06                          | -12.8765      | 1.6134                       | 2.6029          |

**Table S17**

Comparison of all isotherm models.

| Isotherm Models     | Parameter      | Value                                                          |
|---------------------|----------------|----------------------------------------------------------------|
| Langmuir isotherm   | $Q_o$          | 0.974902768 mg g <sup>-1</sup>                                 |
|                     | b              | 7.804462635*10 <sup>-4</sup> dm <sup>3</sup> mol <sup>-1</sup> |
|                     | R <sup>2</sup> | 0.9936                                                         |
| D-R isotherm        | $\beta$        | 1.2327 KJ <sup>2</sup> mol <sup>-2</sup>                       |
|                     | $E_s$          | 0.6368780837Kjmol <sup>-1</sup>                                |
|                     | R <sup>2</sup> | 0.9555                                                         |
| Freundlich isotherm | n              | 2.094240838                                                    |
|                     | $K_f$          | 1.093805198 *10 <sup>9</sup> mg g <sup>-1</sup>                |

|  |                |        |
|--|----------------|--------|
|  | R <sup>2</sup> | 0.9407 |
|--|----------------|--------|

**Table S18**

Error analysis for Kinetic and Isotherm models

|                       | Models                        | ERRSQ            | ARE             | HYBRID          | EABS           | MPSD              |
|-----------------------|-------------------------------|------------------|-----------------|-----------------|----------------|-------------------|
| <b>KINETIC MODELS</b> | 1. Pseudo First Order         | 1.398E-01        | 32.117          | 5.314           | 1.032          | 23.053            |
|                       | <b>2. Pseudo Second Order</b> | <b>1.363E-01</b> | <b>-32.00</b>   | <b>5.012</b>    | <b>-1.004</b>  | <b>22.387</b>     |
|                       | 3. Intraparticle Diffusion    | 1.355E+00        | 90.58           | 29.776          | 2.945          | 54.568            |
|                       | 4. Liquid Film                | 7.602E-01        | 87.037          | 27.6            | 2.835          | 52.542            |
| <b>ISOTHERM</b>       | <b>1. Langmuir isotherm</b>   | <b>7.603E+00</b> | <b>-6.5E+07</b> | <b>8.04E+07</b> | <b>-7.7992</b> | <b>8.9664E+04</b> |
|                       | 2. Freundlich isotherm        | 9.571E+18        | -8.1E+16        | 1.01E+26        | -8.7E+09       | 1.006E+14         |
|                       | 3. D-R isotherm               | 1.216E+01        | -9.12E+7        | 1.29E+08        | -9.8620        | 1.134E+05         |

**Table S19**

Statistical data for thermodynamics parameters

| $C_e \left( \frac{\text{mol}}{\text{L}} \right)$ | $C_a = C_e - C_i$<br>(mol/L) | <b>T</b><br>(C <sup>0</sup> ) | <b>T</b><br>(K) | $\frac{1}{T}$ | $K_c = \frac{C_a}{C_e}$ | $\ln K_c$ |
|--------------------------------------------------|------------------------------|-------------------------------|-----------------|---------------|-------------------------|-----------|
| 7.007E-07                                        | 3.06E-05                     | 10                            | 283             | 0.0035        | 43.6190                 | 3.7754    |

|           |          |    |     |        |         |        |
|-----------|----------|----|-----|--------|---------|--------|
| 1.184E-06 | 3.01E-05 | 20 | 293 | 0.0034 | 25.3943 | 3.2345 |
| 1.668E-06 | 2.96E-05 | 30 | 303 | 0.0033 | 17.74   | 2.8758 |
| 2.702E-06 | 2.86E-05 | 40 | 313 | 0.0032 | 10.5679 | 2.3578 |
| 3.953E-06 | 2.73E-05 | 50 | 323 | 0.0031 | 6.9072  | 1.9326 |
| 5.01E-06  | 2.63E-05 | 60 | 333 | 0.0030 | 5.2495  | 1.6581 |
| 7.89E-06  | 2.34E-05 | 70 | 343 | 0.0029 | 2.9658  | 1.0871 |

**Table S20**

Calculation of thermodynamic parameters.

| T(C°) | T(K) | $\Delta G(\text{kJmol}^{-1})$ | $\Delta H(\text{kJmol}^{-1})$ | $\Delta S(\text{Jmol}^{-1}\text{K}^{-1})$ |
|-------|------|-------------------------------|-------------------------------|-------------------------------------------|
| 10    | 283  | -0.6278                       | -35.0601                      | -0.1217                                   |
| 20    | 293  | -0.5378                       | -35.0601                      | -0.1178                                   |
| 30    | 303  | -0.4782                       | -35.0601                      | -0.1141                                   |
| 40    | 313  | -0.3921                       | -35.0601                      | -0.1108                                   |
| 50    | 323  | -0.3213                       | -35.0601                      | -0.1076                                   |
| 60    | 333  | -0.2757                       | -35.0601                      | -0.1044                                   |
| 70    | 343  | -0.1808                       | -35.0601                      | -0.1017                                   |

Table S21. Key parameters of bed depth service time (BDST) model.

|             |   |   |       |
|-------------|---|---|-------|
| $C_t / C_o$ | a | b | $R^2$ |
|-------------|---|---|-------|

|     |        |        |        |
|-----|--------|--------|--------|
| 0.4 | 87.596 | 62.565 | 0.9954 |
| 0.6 | 102.99 | 46.499 | 0.9928 |
| 0.8 | 186.20 | 68.413 | 0.9793 |

**Table S22**

Result of experiment to study the effect of tap water (Experimental conditions; Adsorbent dose = (0.25 g), Volume = 10 ml,  $C_o = 10$  ppm, Contact time = 50 min, pH = 7, Temperature =  $10^\circ\text{C}$ ).

| $C_i$ (ppm) | $A_i$ | $A_f$ | $C_e$     | % Removal |
|-------------|-------|-------|-----------|-----------|
| 10          | 1.585 | 0.122 | 0.5760151 | 92.302    |

**Table S23**

Result of experiment to study the effect of well water (Experimental conditions; Adsorbent dose = (0.25 g), Volume = 10 ml,  $C_o = 10$  ppm, Contact time = 50 min, pH = 7, Temperature =  $10^\circ\text{C}$ ).

| $C_i$ (ppm) | $A_i$ | $A_f$ | $C_e$  | % Removal |
|-------------|-------|-------|--------|-----------|
| 10          | 1.248 | 0.058 | 0.6872 | 95.352    |

**Table S24**

Result of experiment to study the effect of river water (Experimental conditions; Adsorbent dose = (0.25 g), Volume = 10 ml,  $C_o = 10$  ppm, Contact time = 50 min, pH = 7, Temperature =  $10^\circ\text{C}$ ).

| $C_i$ (ppm) | $A_i$ | $A_f$ | $C_e$  | % Removal |
|-------------|-------|-------|--------|-----------|
| 10          | 2.347 | 0.183 | 0.6016 | 92.203    |

**Table S25**

Effect of various ions on adsorption capacity of adsorbent.

| Cations   | Adsorption % | Anions   | Adsorption % |
|-----------|--------------|----------|--------------|
| No cation | 97.11        | No anion | 97.11        |
| Potassium | 96.35        | Sulphate | 91.36        |
| Zinc      | 96.78        | Iodide   | 94.78        |

|           |       |                         |       |
|-----------|-------|-------------------------|-------|
| Sodium    | 96.22 | Chromate                | 85.83 |
| Copper    | 95.99 | Chloride                | 96.35 |
| Barium    | 92.66 | Bromide                 | 91.83 |
| Magnesium | 95.69 | Oxalate                 | 83.52 |
| Ammonium  | 94.49 | Dihydrogen<br>phosphate | 86.41 |

**Table S26**

Result of desorption study.

|                              |                                               |
|------------------------------|-----------------------------------------------|
| Adsorbent                    | Rice husk biochar and burnt clay<br>composite |
| Adsorbate (Dye)              | Methylene blue                                |
| Chemical used for desorption | 1 M HNO <sub>3</sub>                          |
| Contact time                 | 50 min                                        |
| % desorption                 | 90 %                                          |
